# Supplementary material for: Metabolite Profiling of Alzheimer's Disease Cerebrospinal Fluid
Source: PLoS One. 2012 Feb 16;7(2):e31501. doi: 10.1371/journal.pone.0031501 (PMC3281064; doi:10.1371/journal.pone.0031501)
Supplement: Table S2 — The table S2 shows the results as mean of the group values of the metabolites measured in CSF with absolute quantification. All values are in ng/ml. (PDF) [file pone.0031501.s002.pdf]

Supplement Table 2

| Supplement Table 2              |                                         |                                                                    | Mean of Group Value |                   |                         |                          |                 |                    |                                |                                 |               |                  |                              |                               |
|---------------------------------|-----------------------------------------|--------------------------------------------------------------------|---------------------|-------------------|-------------------------|--------------------------|-----------------|--------------------|--------------------------------|---------------------------------|---------------|------------------|------------------------------|-------------------------------|
| Quantification method           | Metabolite Name                         | Metabolite Class                                                   | Female + Male       |                   |                         |                          | Female          |                    |                                |                                 | Male          |                  |                              |                               |
|                                 |                                         |                                                                    | Ctr                 |                   | AD patients             |                          | Ctr             |                    | AD patients                    |                                 | Ctr           |                  | AD patients                  |                               |
|                                 |                                         |                                                                    | Controls (all)      | AD patients (all) | AD patients (MMSE > 22) | AD patients (MMSE 14-22) | Female Controls | Female AD patients | Female AD patients (MMSE > 22) | Female AD patients (MMSE 14-22) | Male Controls | Male AD patients | Male AD patients (MMSE > 22) | Male AD patients (MMSE 14-22) |
| Number of samples               |                                         |                                                                    | 51                  | 79                | 53                      | 26                       | 27              | 44                 | 30                             | 14                              | 24            | 35               | 23                           | 12                            |
| absolute quantification (ng/ml) | Homovanillic acid                       | Steroid hormones, catecholamines and related (quantitative values) | 72.7                | 80.9              | 87.1                    | 69.3                     | 76.7            | 89.4               | 94.7                           | 80.0                            | 68.4          | 71.4             | 78.9                         | 56.9                          |
| absolute quantification (ng/ml) | 5-Hydroxy-3-indoleacetic acid (5-HIAA)  |                                                                    | 53.7                | 55.5              | 59.1                    | 48.7                     | 55.6            | 64.3               | 68.3                           | 57.2                            | 51.6          | 45.6             | 49.2                         | 38.8                          |
| absolute quantification (ng/ml) | 3,4-Dihydroxyphenylacetic acid          |                                                                    | 0.91                | 0.96              | 1.00                    | 0.88                     | 0.95            | 0.96               | 0.99                           | 0.91                            | 0.87          | 0.96             | 1.03                         | 0.84                          |
| absolute quantification (ng/ml) | 3,4-Dihydroxyphenylglycol (DOPEG)       |                                                                    | 1.30                | 1.23              | 1.22                    | 1.25                     | 1.29            | 1.16               | 1.13                           | 1.23                            | 1.32          | 1.31             | 1.33                         | 1.27                          |
| absolute quantification (ng/ml) | Dopamine                                |                                                                    | 0.113               | 0.120             | 0.119                   | 0.120                    | 0.114           | 0.120              | 0.120                          | 0.119                           | 0.112         | 0.120            | 0.118                        | 0.122                         |
| absolute quantification (ng/ml) | Noradrenaline                           |                                                                    | 0.22                | 0.29              | 0.29                    | 0.29                     | 0.23            | 0.29               | 0.29                           | 0.28                            | 0.22          | 0.3              | 0.3                          | 0.3                           |
| absolute quantification (ng/ml) | 3,4-Dihydroxyphenylalanine (DOPA)       |                                                                    | 0.82                | 0.92              | 0.93                    | 0.88                     | 0.77            | 0.9                | 0.88                           | 0.92                            | 0.87          | 0.94             | 0.99                         | 0.84                          |
| absolute quantification (ng/ml) | 3-Methoxy-tyrosine                      |                                                                    | 2.87                | 3.06              | 3.04                    | 3.11                     | 2.80            | 3.04               | 3.01                           | 3.08                            | 2.95          | 3.09             | 3.06                         | 3.14                          |
| absolute quantification (ng/ml) | 4-Hydroxy-3-methoxy-phenylglycol (MHPG) |                                                                    | 11.2                | 9.9               | 9.8                     | 10.1                     | 11.3            | 10.1               | 10.0                           | 10.4                            | 11.1          | 9.6              | 9.5                          | 9.7                           |
| absolute quantification (ng/ml) | Histamine                               |                                                                    | 0.105               | 0.093             | 0.086                   | 0.106                    | 0.110           | 0.108              | 0.094                          | 0.133                           | 0.100         | 0.077            | 0.077                        | 0.076                         |
| absolute quantification (ng/ml) | Testosterone                            |                                                                    | 0.085               | 0.081             | 0.082                   | 0.078                    | 0.061           | 0.060              | 0.060                          | 0.059                           | 0.111         | 0.106            | 0.109                        | 0.101                         |
| absolute quantification (ng/ml) | 21-Hydroxyprogesterone                  |                                                                    | 0.091               | 0.097             | 0.098                   | 0.097                    | 0.088           | 0.098              | 0.100                          | 0.094                           | 0.094         | 0.097            | 0.096                        | 0.100                         |
| absolute quantification (ng/ml) | Corticosterone                          |                                                                    | 0.28                | 0.30              | 0.30                    | 0.28                     | 0.27            | 0.28               | 0.30                           | 0.24                            | 0.29          | 0.32             | 0.30                         | 0.34                          |
| absolute quantification (ng/ml) | Cortisol                                |                                                                    | 5.24                | 6.78              | 6.64                    | 7.06                     | 5.15            | 6.79               | 6.54                           | 7.30                            | 5.33          | 6.76             | 6.76                         | 6.76                          |
| absolute quantification (ng/ml) | Normetanephrine                         |                                                                    | 0.12                | 0.15              | 0.16                    | 0.15                     | 0.12            | 0.15               | 0.15                           | 0.15                            | 0.12          | 0.15             | 0.16                         | 0.14                          |
